# Supplementary material for: Seed Bank Conservation and Incipient Seed Development in Orchids Colonizing Mining Wastes: Results of a Field Pilot Experiment
Source: MDPI journal article supplement (doi:10.3390/plants11233315), 2022-12-01
Supplement: s1 [file s1]

**Table S1.** Seed counts in each retrieval campaign.

The number of seed retrieved in each sowing treatment during the experiment (from t1 to t5) is reported as mean value (n=3)  $\pm$  standard deviation (SD).

| Retrieval campaign | Sowing treatment | Seed number (mean $\pm$ SD) |
|--------------------|------------------|-----------------------------|
| t1                 | <i>PP in PP</i>  | 283.33 $\pm$ 34.00          |
|                    | <i>PP in NP</i>  | 269.67 $\pm$ 22.19          |
|                    | <i>NP in NP</i>  | 255.00 $\pm$ 7.55           |
|                    | <i>NP in PP</i>  | 276.00 $\pm$ 41.15          |
| t2                 | <i>PP in PP</i>  | 277.33 $\pm$ 25.54          |
|                    | <i>PP in NP</i>  | 255.00 $\pm$ 7.21           |
|                    | <i>NP in NP</i>  | 322.00 $\pm$ 17.35          |
|                    | <i>NP in PP</i>  | 275.00 $\pm$ 43.71          |
| t3                 | <i>PP in PP</i>  | 295.00 $\pm$ 17.44          |
|                    | <i>PP in NP</i>  | 278.33 $\pm$ 35.70          |
|                    | <i>NP in NP</i>  | 318.00 $\pm$ 47.47          |
|                    | <i>NP in PP</i>  | 307.00 $\pm$ 31.43          |
| t4                 | <i>PP in PP</i>  | 271.33 $\pm$ 34.31          |
|                    | <i>PP in NP</i>  | 233.00 $\pm$ 1.00           |
|                    | <i>NP in NP</i>  | 251.00 $\pm$ 18.36          |
|                    | <i>NP in PP</i>  | 277.33 $\pm$ 44.23          |
| t5                 | <i>PP in PP</i>  | 282.33 $\pm$ 15.95          |
|                    | <i>PP in NP</i>  | 236.67 $\pm$ 42.03          |
|                    | <i>NP in NP</i>  | 267.67 $\pm$ 18.93          |
|                    | <i>NP in PP</i>  | 279.00 $\pm$ 53.00          |

**Table S2.** Variation in number of seeds between t1 and t5 retrieval campaigns.

The number of seeds collected during the first and the last of the retrieval campaigns were tested to significantly differ between each other.

| Sowing treatment | Test   | Test statistics | Degree of freedom | p-value |
|------------------|--------|-----------------|-------------------|---------|
| <i>PP in PP</i>  | t-test | 0.046           | 4                 | 0.965   |
| <i>PP in NP</i>  | t-test | 1.203           | 4                 | 0.295   |
| <i>NP in NP</i>  | t-test | -1.076          | 4                 | 0.342   |
| <i>NP in PP</i>  | t-test | -0.077          | 4                 | 0.942   |

**Table S3.** Analysis of variance on the number of seeds collected in the five retrieval campaigns (from t1 to t5).

| Sowing treatment | Test  | Test statistics | Degree of freedom | p-value | Effect size |
|------------------|-------|-----------------|-------------------|---------|-------------|
| <i>PP in PP</i>  | ANOVA | 0.324           | 4                 | 0.856   | 0.36        |
| <i>PP in NP</i>  | ANOVA | 1.651           | 4                 | 0.237   | 0.81        |
| <i>NP in NP</i>  | ANOVA | 5.431           | 4                 | 0.014   | 1.47        |
| <i>NP in PP</i>  | ANOVA | 0.295           | 4                 | 0.874   | 0.34        |

**Table S4.** Results of the GLM regression on seed counts.

Summary of the GLM quasi-Poisson regression implemented on seed count in the sowing treatments (first column). Time was chosen as explanatory variable (second column) the estimated effect and the standard error (SE) are reported on the third and fourth columns respectively. The fifth column reports effects'  $p$ -values.

| Sowing treatment | Retrieval campaign | Estimate | SE    | $p$ -value |
|------------------|--------------------|----------|-------|------------|
| <i>PP in PP</i>  | Intercept          | 5.65     | 0.35  | <0.001     |
|                  | t2                 | -0.02    | 0.05  | 0.66       |
|                  | t3                 | 0.04     | 0.05  | 0.40       |
|                  | t4                 | -0.04    | 0.05  | 0.38       |
|                  | t5                 | -0.004   | 0.05  | 0.94       |
| <i>PP in NP</i>  | intercept          | 5.60     | 0.06  | <0.001     |
|                  | t2                 | -0.06    | 0.08  | 0.52       |
|                  | t3                 | 0.03     | 0.08  | 0.71       |
|                  | t4                 | -0.15    | 0.09  | 0.12       |
|                  | t5                 | -0.13    | 0.09  | 0.16       |
| <i>NP in NP</i>  | intercept          | 5.54     | 0.05  | <0.001     |
|                  | t2                 | 0.23     | 0.07  | 0.009      |
|                  | t3                 | 0.22     | 0.07  | 0.01       |
|                  | t4                 | -0.02    | 0.08  | 0.84       |
|                  | t5                 | 0.05     | 0.07  | 0.53       |
| <i>NP in PP</i>  | intercept          | 5.62     | 0.09  | <0.001     |
|                  | t2                 | -0.004   | 0.13  | 0.99       |
|                  | t3                 | 0.11     | 0.12  | 0.41       |
|                  | t4                 | 0.005    | 0.127 | 0.97       |
|                  | t5                 | 0.01     | 0.13  | 0.93       |

**Table S5.** Seed morphometric data.

Morphometric parameters (first and fifth columns) measured in each sowing treatment (second and sixth columns) in the different retrieval campaigns (third and seventh columns) are reported as mean value  $\pm$  SE (fourth and eighth columns). *PP in PP* indicates metallicolous seeds sowed in the tailing dump; *PP in NP* indicates metallicolous seeds sowed in the control site; *NP in NP* indicates control seeds sowed in the control site; *NP in PP* indicates control seeds sowed in the tailing dump.

| <i>Parameter</i> | <i>Sowing treatment</i> | <i>Retrieval campaign</i> | <i>Mean <math>\pm</math> SE</i><br>(mm/mm <sup>2</sup> ) | <i>Parameter</i> | <i>Sowing treatment</i> | <i>Retrieval campaign</i> | <i>Mean <math>\pm</math> SE</i><br>(mm/mm <sup>2</sup> ) |
|------------------|-------------------------|---------------------------|----------------------------------------------------------|------------------|-------------------------|---------------------------|----------------------------------------------------------|
| Coat width       | <i>PP in PP</i>         | t1                        | 0.25 $\pm$ 0.011                                         | Embryo width     | <i>PP in PP</i>         | t1                        | 0.119 $\pm$ 0.004                                        |
|                  |                         | t2                        | 0.29 $\pm$ 0.009                                         |                  |                         | t2                        | 0.127 $\pm$ 0.003                                        |
|                  |                         | t3                        | 0.33 $\pm$ 0.016                                         |                  |                         | t3                        | 0.135 $\pm$ 0.003                                        |
|                  |                         | t4                        | 0.26 $\pm$ 0.012                                         |                  |                         | t4                        | 0.130 $\pm$ 0.004                                        |
|                  |                         | t5                        | 0.30 $\pm$ 0.018                                         |                  |                         | t5                        | 0.141 $\pm$ 0.004                                        |
|                  | <i>PP in NP</i>         | t1                        | 0.28 $\pm$ 0.011                                         |                  | <i>PP in NP</i>         | t1                        | 0.123 $\pm$ 0.007                                        |
|                  |                         | t2                        | 0.29 $\pm$ 0.011                                         |                  |                         | t2                        | 0.128 $\pm$ 0.005                                        |
|                  |                         | t3                        | 0.28 $\pm$ 0.018                                         |                  |                         | t3                        | 0.134 $\pm$ 0.007                                        |
|                  |                         | t4                        | 0.28 $\pm$ 0.015                                         |                  |                         | t4                        | 0.138 $\pm$ 0.005                                        |
|                  |                         | t5                        | 0.27 $\pm$ 0.013                                         |                  |                         | t5                        | 0.133 $\pm$ 0.005                                        |
|                  | <i>NP in NP</i>         | t1                        | 0.26 $\pm$ 0.012                                         |                  | <i>NP in NP</i>         | t1                        | 0.145 $\pm$ 0.009                                        |
|                  |                         | t2                        | 0.26 $\pm$ 0.008                                         |                  |                         | t2                        | 0.135 $\pm$ 0.004                                        |
|                  |                         | t3                        | 0.26 $\pm$ 0.009                                         |                  |                         | t3                        | 0.125 $\pm$ 0.004                                        |
|                  |                         | t4                        | 0.28 $\pm$ 0.010                                         |                  |                         | t4                        | 0.132 $\pm$ 0.008                                        |
|                  |                         | t5                        | 0.28 $\pm$ 0.014                                         |                  |                         | t5                        | 0.127 $\pm$ 0.006                                        |
|                  | <i>NP in PP</i>         | t1                        | 0.23 $\pm$ 0.013                                         |                  | <i>NP in PP</i>         | t1                        | 0.136 $\pm$ 0.007                                        |
|                  |                         | t2                        | 0.24 $\pm$ 0.009                                         |                  |                         | t2                        | 0.129 $\pm$ 0.006                                        |
|                  |                         | t3                        | 0.25 $\pm$ 0.011                                         |                  |                         | t3                        | 0.123 $\pm$ 0.008                                        |
|                  |                         | t4                        | 0.27 $\pm$ 0.008                                         |                  |                         | t4                        | 0.132 $\pm$ 0.005                                        |
|                  |                         | t5                        | 0.27 $\pm$ 0.02                                          |                  |                         | t5                        | 0.135 $\pm$ 0.003                                        |
| Coat length      | <i>PP in PP</i>         | t1                        | 1.16 $\pm$ 0.039                                         | Embryo length    | <i>PP in PP</i>         | t1                        | 0.25 $\pm$ 0.008                                         |
|                  |                         | t2                        | 1.11 $\pm$ 0.026                                         |                  |                         | t2                        | 0.24 $\pm$ 0.005                                         |
|                  |                         | t3                        | 1.07 $\pm$ 0.031                                         |                  |                         | t3                        | 0.23 $\pm$ 0.007                                         |
|                  |                         | t4                        | 1.00 $\pm$ 0.056                                         |                  |                         | t4                        | 0.22 $\pm$ 0.006                                         |
|                  |                         | t5                        | 1.07 $\pm$ 0.06                                          |                  |                         | t5                        | 0.24 $\pm$ 0.005                                         |
|                  | <i>PP in NP</i>         | t1                        | 1.01 $\pm$ 0.065                                         |                  | <i>PP in NP</i>         | t1                        | 0.24 $\pm$ 0.008                                         |
|                  |                         | t2                        | 1.08 $\pm$ 0.039                                         |                  |                         | t2                        | 0.23 $\pm$ 0.007                                         |
|                  |                         | t3                        | 1.05 $\pm$ 0.041                                         |                  |                         | t3                        | 0.23 $\pm$ 0.007                                         |
|                  |                         | t4                        | 1.09 $\pm$ 0.066                                         |                  |                         | t4                        | 0.22 $\pm$ 0.004                                         |
|                  |                         | t5                        | 1.03 $\pm$ 0.059                                         |                  |                         | t5                        | 0.23 $\pm$ 0.007                                         |
|                  | <i>NP in NP</i>         | t1                        | 0.90 $\pm$ 0.048                                         |                  | <i>NP in NP</i>         | t1                        | 0.22 $\pm$ 0.01                                          |
|                  |                         | t2                        | 0.88 $\pm$ 0.040                                         |                  |                         | t2                        | 0.21 $\pm$ 0.008                                         |
|                  |                         | t3                        | 0.86 $\pm$ 0.062                                         |                  |                         | t3                        | 0.20 $\pm$ 0.012                                         |
|                  |                         | t4                        | 0.94 $\pm$ 0.055                                         |                  |                         | t4                        | 0.23 $\pm$ 0.01                                          |
|                  |                         | t5                        | 1.00 $\pm$ 0.045                                         |                  |                         | t5                        | 0.22 $\pm$ 0.008                                         |
|                  | <i>NP in PP</i>         | t1                        | 0.88 $\pm$ 0.042                                         |                  | <i>NP in PP</i>         | t1                        | 0.23 $\pm$ 0.01                                          |
|                  |                         | t2                        | 0.92 $\pm$ 0.031                                         |                  |                         | t2                        | 0.23 $\pm$ 0.005                                         |
|                  |                         | t3                        | 0.96 $\pm$ 0.058                                         |                  |                         | t3                        | 0.23 $\pm$ 0.01                                          |
|                  |                         | t4                        | 0.90 $\pm$ 0.053                                         |                  |                         | t4                        | 0.23 $\pm$ 0.008                                         |
|                  |                         | t5                        | 0.81 $\pm$ 0.040                                         |                  |                         | t5                        | 0.24 $\pm$ 0.007                                         |
| Coat area        | <i>PP in PP</i>         | t1                        | 0.23 $\pm$ 0.013                                         | Embryo area      | <i>PP in PP</i>         | t1                        | 0.023 $\pm$ 0.001                                        |
|                  |                         | t2                        | 0.24 $\pm$ 0.009                                         |                  |                         | t2                        | 0.024 $\pm$ 0.001                                        |
|                  |                         | t3                        | 0.26 $\pm$ 0.013                                         |                  |                         | t3                        | 0.025 $\pm$ 0.001                                        |
|                  |                         | t4                        | 0.23 $\pm$ 0.011                                         |                  |                         | t4                        | 0.023 $\pm$ 0.001                                        |
|                  |                         | t5                        | 0.23 $\pm$ 0.021                                         |                  |                         | t5                        | 0.026 $\pm$ 0.001                                        |
|                  | <i>PP in NP</i>         | t1                        | 0.23 $\pm$ 0.012                                         |                  | <i>PP in NP</i>         | t1                        | 0.023 $\pm$ 0.002                                        |
|                  |                         | t2                        | 0.23 $\pm$ 0.013                                         |                  |                         | t2                        | 0.024 $\pm$ 0.001                                        |
|                  |                         |                           |                                                          |                  |                         |                           |                                                          |

|  |                 |    |                  |  |                 |    |                   |
|--|-----------------|----|------------------|--|-----------------|----|-------------------|
|  |                 | t3 | $0.23 \pm 0.019$ |  |                 | t3 | $0.024 \pm 0.002$ |
|  |                 | t4 | $0.23 \pm 0.019$ |  |                 | t4 | $0.024 \pm 0.001$ |
|  |                 | t5 | $0.21 \pm 0.017$ |  |                 | t5 | $0.024 \pm 0.002$ |
|  | <i>NP in NP</i> | t1 | $0.19 \pm 0.018$ |  | <i>NP in NP</i> | t1 | $0.025 \pm 0.002$ |
|  |                 | t2 | $0.18 \pm 0.013$ |  |                 | t2 | $0.023 \pm 0.001$ |
|  |                 | t3 | $0.17 \pm 0.013$ |  |                 | t3 | $0.020 \pm 0.001$ |
|  |                 | t4 | $0.21 \pm 0.019$ |  |                 | t4 | $0.024 \pm 0.002$ |
|  |                 | t5 | $0.22 \pm 0.018$ |  |                 | t5 | $0.022 \pm 0.001$ |
|  | <i>NP in PP</i> | t1 | $0.16 \pm 0.011$ |  | <i>NP in PP</i> | t1 | $0.024 \pm 0.002$ |
|  |                 | t2 | $0.17 \pm 0.007$ |  |                 | t2 | $0.024 \pm 0.002$ |
|  |                 | t3 | $0.18 \pm 0.008$ |  |                 | t3 | $0.023 \pm 0.003$ |
|  |                 | t4 | $0.19 \pm 0.016$ |  |                 | t4 | $0.024 \pm 0.001$ |
|  |                 | t5 | $0.19 \pm 0.018$ |  |                 | t5 | $0.025 \pm 0.001$ |

**Table S6.** Analysis of variance results.

Each morphometric parameter (first column) was tested in each sowing treatment (second column) to vary during the experiment. Analysis carried out, together with the *post-hoc* test (if implemented) are reported in the third column while fourth and fifth columns report test results. Sixth column reports the *post-hoc* results. The couples of retrieval campaigns where data were reported to significantly vary are reported in the sixth column linked by the ~ symbol and are accompanied by the p-values of the respective *post-hoc* test, in this column NA indicates the non-applicability of *post-hoc* test due non-significant analysis of variance. Seventh and eighth columns report degrees of freedom and effect size of the analysis respectively. *PP in PP* indicates metalicolous seeds sowed in the tailing dump; *PP in NP* indicates metalicolous seeds sowed in the control site; *NP in NP* indicates control seeds sowed in the control site; *NP in PP* indicates control seeds sowed in the tailing dump.

| <i>Morphometric parameter</i> | <i>Sowing treatment</i> | <i>Variance test / post-hoc test</i> | <i>Variance test F value / chi-squared</i> | <i>p-values</i> | <i>Post-hoc test results</i>                                               | <i>Degrees of freedom</i> | <i>Effect size</i> |
|-------------------------------|-------------------------|--------------------------------------|--------------------------------------------|-----------------|----------------------------------------------------------------------------|---------------------------|--------------------|
| Coat Width                    | <i>PP in PP</i>         | ANOVA / Tukey's                      | 5.37                                       | 0.001           | t3~t1, p-value = 0.002<br>t4~t3, p-value = 0.005                           | 4                         | 0.66               |
|                               | <i>PP in NP</i>         | Kruskall                             | 1.76                                       | 0.78            | NA                                                                         | 4                         | -0.05              |
|                               | <i>NP in NP</i>         | ANOVA                                | 0.99                                       | 0.42            | NA                                                                         | 4                         | 0.29               |
|                               | <i>NP in PP</i>         | ANOVA                                | 2.13                                       | 0.09            | NA                                                                         | 4                         | 0.43               |
| Coat length                   | <i>PP in PP</i>         | ANOVA                                | 1.81                                       | 0.14            | NA                                                                         | 4                         | 0.09               |
|                               | <i>PP in NP</i>         | ANOVA                                | 0.26                                       | 0.90            | NA                                                                         | 4                         | 0.15               |
|                               | <i>NP in NP</i>         | Kruskall                             | 4.9                                        | 0.3             | NA                                                                         | 4                         | 0.02               |
|                               | <i>NP in PP</i>         | ANOVA                                | 1.46                                       | 0.23            | NA                                                                         | 4                         | 0.35               |
| Coat area                     | <i>PP in PP</i>         | ANOVA / Tukey's                      | 4.51                                       | 0.003           | t4~t3, p-value = 0.006<br>t5~t4, p-value = 0.007                           | 4                         | 0.61               |
|                               | <i>PP in NP</i>         | ANOVA                                | 0.22                                       | 0.92            | NA                                                                         | 4                         | 0.14               |
|                               | <i>NP in NP</i>         | ANOVA                                | 1.37                                       | 0.25            | NA                                                                         | 4                         | 0.34               |
|                               | <i>NP in PP</i>         | Kruskall                             | 2.38                                       | 0.67            | NA                                                                         | 4                         | -0.03              |
| Embryo Width                  | <i>PP in PP</i>         | Kruskall / Pairwise test U           | 15.01                                      | 0.005           | t1~t3, p-value = 0.042<br>t1~t5, p-value = 0.042<br>t2~t5, p-value = 0.042 | 4                         | 0.22               |
|                               | <i>PP in NP</i>         | ANOVA                                | 0.96                                       | 0.44            | NA                                                                         | 4                         | 0.29               |
|                               | <i>NP in NP</i>         | Kruskall                             | 5.047                                      | 0.904           | NA                                                                         | 4                         | 0.02               |
|                               | <i>NP in PP</i>         | ANOVA                                | 0.67                                       | 0.61            | NA                                                                         | 4                         | 0.24               |
| Embryo Length                 | <i>PP in PP</i>         | ANOVA                                | 2.13                                       | 0.091           | NA                                                                         | 4                         | 0.42               |
|                               | <i>PP in NP</i>         | ANOVA                                | 0.56                                       | 0.69            | NA                                                                         | 4                         | 0.22               |
|                               | <i>NP in NP</i>         | ANOVA                                | 0.86                                       | 0.5             | NA                                                                         | 4                         | 0.27               |
|                               | <i>NP in PP</i>         | ANOVA                                | 0.19                                       | 0.94            | NA                                                                         | 4                         | 0.13               |
| Embryo Area                   | <i>PP in PP</i>         | Kruskall                             | 9.41                                       | 0.051           | NA                                                                         | 4                         | 0.11               |
|                               | <i>PP in NP</i>         | ANOVA                                | 0.12                                       | 0.97            | NA                                                                         | 4                         | 0.29               |
|                               | <i>NP in NP</i>         | ANOVA                                | 1.39                                       | 0.25            | NA                                                                         | 4                         | 0.15               |
|                               | <i>NP in PP</i>         | ANOVA                                | 0.27                                       | 0.89            | NA                                                                         | 4                         | 0.15               |

**Table S7.** Swelling seeds comparison with unmodified seeds.

Observed swelling seeds were tested to present significantly greater size than non-swelling seeds observed in the same sowing treatment and retrieval campaign (first and second column respectively). Morphometric parameters are reported in the fourth column of the table, while fifth and sixth columns report test results (p-values are corrected by Bonferroni correction). *PP in PP* indicates metallicolous seeds sowed in the tailing dump; *PP in NP* indicates metallicolous seeds sowed in the control site; *NP in NP* indicates control seeds sowed in the control site; *NP in PP* indicates control seeds sowed in the tailing dump.

| <i>Sowing treatment</i> | <i>Retrieval campaign</i> | <i>Morphometric parameter</i> | <i>Test</i>    | <i>Test statistics</i> | <i>Degree of freedom</i> | <i>p-value</i>       | <i>Adjusted p-value</i> | <i>Effect size</i> |
|-------------------------|---------------------------|-------------------------------|----------------|------------------------|--------------------------|----------------------|-------------------------|--------------------|
| <i>PP in PP</i>         | t3 (n = 1)                | Coat width                    | <i>t</i> -test | t = -2.4038            | 10                       | 0.02                 | 1.112 <sup>-1</sup>     | 0.72               |
|                         |                           | Coat length                   | <i>t</i> -test | t = 2.883              | 10                       | 0.992                | 1.000                   | 0.87               |
|                         |                           | Coat area                     | <i>t</i> -test | t = -1.465             | 10                       | 0.087                | 5.213 <sup>-1</sup>     | 0.44               |
|                         |                           | Embryo width                  | U test         | W = NA                 | 9                        | 0.002                | 9.720 <sup>-3</sup>     | 0.90               |
|                         |                           | Embryo length                 | <i>t</i> -test | t = -1.991             | 10                       | 0.037                | 2.236 <sup>-1</sup>     | 0.60               |
|                         |                           | Embryo area                   | <i>t</i> -test | t = -17.394            | 10                       | 4.182 <sup>-9</sup>  | 2.509 <sup>-8</sup>     | 5.24               |
| <i>NP in NP</i>         | t3 (n = 4)                | Coat width                    | <i>t</i> -test | t = -3.182             | 9                        | 0.006                | 3.345 <sup>-2</sup>     | 1.01               |
|                         |                           | Coat length                   | <i>t</i> -test | t = 1.515              | 9                        | 0.918                | 1.000                   | 0.48               |
|                         |                           | Coat area                     | <i>t</i> -test | t = 1.882              | 9                        | 0.954                | 1.000                   | 0.59               |
|                         |                           | Embryo width                  | U test         | W = NA                 | 9                        | 0.003                | 1.634 <sup>-2</sup>     | 0.89               |
|                         |                           | Embryo length                 | U test         | W = NA                 | 9                        | 0.003                | 1.643 <sup>-2</sup>     | 0.89               |
|                         |                           | Embryo area                   | <i>t</i> -test | t = -32.573            | 9                        | 5.958 <sup>-11</sup> | 3.575 <sup>-10</sup>    | 10.30              |
| <i>NP in NP</i>         | T4 (n = 5)                | Coat width                    | <i>t</i> -test | t = -2.775             | 10                       | 0.010                | 5.888 <sup>-2</sup>     | 0.84               |
|                         |                           | Coat length                   | <i>t</i> -test | t = 2.1719             | 10                       | 0.972                | 1.000                   | 0.65               |
|                         |                           | Coat area                     | <i>t</i> -test | t = 1.5471             | 10                       | 0.924                | 1.000                   | 0.47               |
|                         |                           | Embryo width                  | <i>t</i> -test | t = -14.252            | 10                       | 2.855 <sup>-8</sup>  | 1.713 <sup>-7</sup>     | 4.29               |
|                         |                           | Embryo length                 | <i>t</i> -test | t = -5.567             | 10                       | 1.192 <sup>-4</sup>  | 7.152 <sup>-4</sup>     | 1.68               |
|                         |                           | Embryo area                   | <i>t</i> -test | t = -16.911            | 10                       | 5.493 <sup>-9</sup>  | 3.296 <sup>-8</sup>     | 5.10               |
| <i>NP in PP</i>         | t4 (n = 1)                | Coat width                    | <i>t</i> -test | t = -15.103            | 11                       | 5.304 <sup>-9</sup>  | 3.182 <sup>-8</sup>     | 4.36               |
|                         |                           | Coat length                   | <i>t</i> -test | t = 1.8914             | 11                       | 0.957                | 1.000                   | 0.54               |
|                         |                           | Coat area                     | <i>t</i> -test | t = -3.8097            | 10                       | 0.002                | 1.030 <sup>-2</sup>     | 1.15               |
|                         |                           | Embryo width                  | <i>t</i> -test | t = -9.868             | 11                       | 4.22 <sup>-7</sup>   | 2.535 <sup>-6</sup>     | 2.849              |
|                         |                           | Embryo length                 | <i>t</i> -test | t = 6.5998             | 11                       | 1.000                | 1.000                   | 1.905              |
|                         |                           | Embryo area                   | <i>t</i> -test | t = -3.7491            | 11                       | 0.002                | 9.642 <sup>-3</sup>     | 1.082              |

**Table S8.** Heavy metal concentration levels in the tailing dump. Heavy metal concentration levels in the tailing dump that hosts the contaminated population (*PP* in the text). Data are reported as mean values (mg g<sup>-1</sup>) ± standard deviation. Data originally reported (in [14] in the main text).

| Element | Concentration |
|---------|---------------|
| Fe      | 55.98 ± 7.44  |
| Zn      | 13.10 ± 2.71  |
| Pb      | 5.21 ± 0.69   |
| Mn      | 1.24 ± 0.06   |
| Cu      | 0.79 ± 0.08   |

**Table S9.** Rainfall and soil moisture data measured in the study area.

Range of potential evapotranspiration data (third column) and range of precipitation (fourth column) measured during the retrieval campaigns reference months (second column). Data were obtained from climatic monitoring authority of Sardinia and were measured by the weather stations placed in the vicinities of the study area where the field phase of the experiment took place.

**References:**

Agenzia Regionale per la Protezione dell'Ambiente della Sardegna (Arpas), Dipartimento Specialistico Regionale MeteoClimatico 2021a. Riepilogo mensile meteorologico e agrometeorologico - Marzo 2021.

Agenzia Regionale per la Protezione dell'Ambiente della Sardegna (Arpas), Dipartimento Specialistico Regionale MeteoClimatico 2021b. Riepilogo mensile meteorologico e agrometeorologico - Maggio 2021.

Agenzia Regionale per la Protezione dell'Ambiente della Sardegna (Arpas), Dipartimento Specialistico Regionale MeteoClimatico 2020a. Riepilogo mensile meteorologico e agrometeorologico - Novembre 2020.

Agenzia Regionale per la Protezione dell'Ambiente della Sardegna (Arpas), Dipartimento Specialistico Regionale MeteoClimatico 2020b. Riepilogo mensile meteorologico e agrometeorologico - Dicembre 2020.

Agenzia Regionale per la Protezione dell'Ambiente della Sardegna (Arpas), Dipartimento Specialistico Regionale MeteoClimatico 2020c. Riepilogo mensile meteorologico e agrometeorologico - Gennaio 2021.

| <i>Retrieval campaign</i> | <i>Reference month</i> | <i>Potential evapotranspiration (mm)</i> | <i>Rainfall (mm)</i> |
|---------------------------|------------------------|------------------------------------------|----------------------|
| t1                        | November (2020)        | 31 – 35                                  | 21 – 40              |
| t2                        | December (2020)        | 23 – 24                                  | 31 – 40              |
| t3                        | January (2021)         | 21 – 25                                  | 41 – 50              |
| t4                        | March (2021)           | 61 – 65                                  | 0 – 5                |
| t5                        | May (2021)             | 111 – 120                                | 21 – 30              |

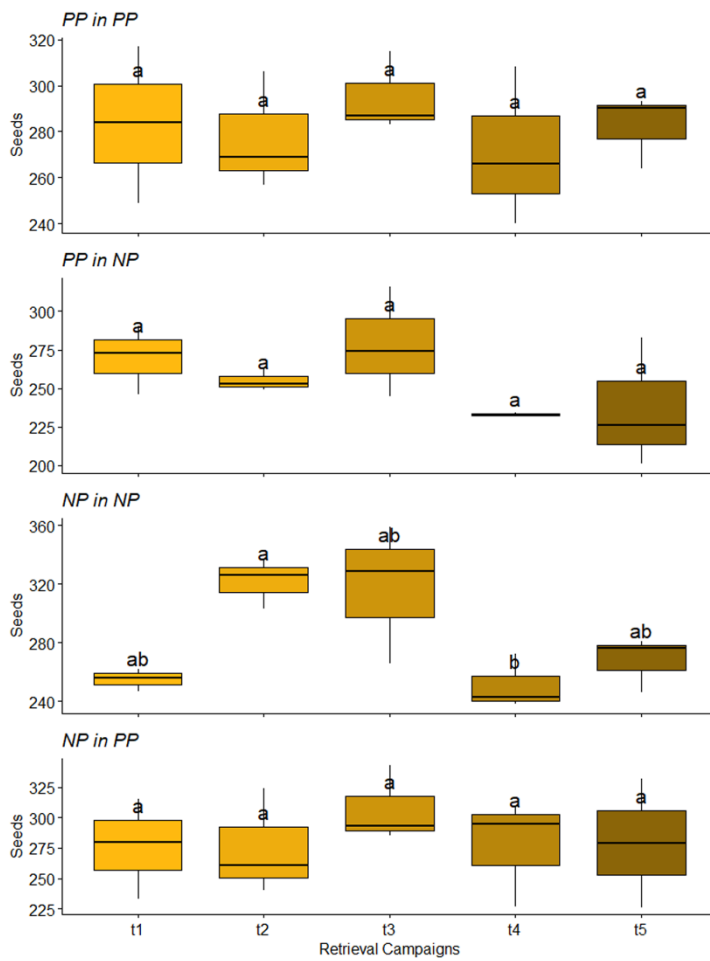

**Figure S1.** Seed count in each retrieval campaign in the different sowing treatments.

Each panel of the figure reports data from the different sowing treatments (PP in PP indicates metallicolous seeds sowed in the tailing dump; PP in NP indicates metallicolous seeds sowed in the control site; NP in NP indicates control seeds sowed in the control site; NP in PP indicates control seeds sowed in the tailing dump). Number of seeds is reported on the y axis, retrieval campaigns are reported on the x axis. The different retrieval campaigns are indicated by different colours. ANOVA results are reported above each series of boxplots as compact letter display. Level alpha at 0.05. Each boxplot reports 50% of the measured values (inside the box), comprised between the first quartile value (lower side of the box) and the third quartile value (upper side of the box), the median is indicated by the black line inside the box, while whiskers join the first and third quartiles with lower and higher measured value respectively (if present, outliers are reported as black dots).

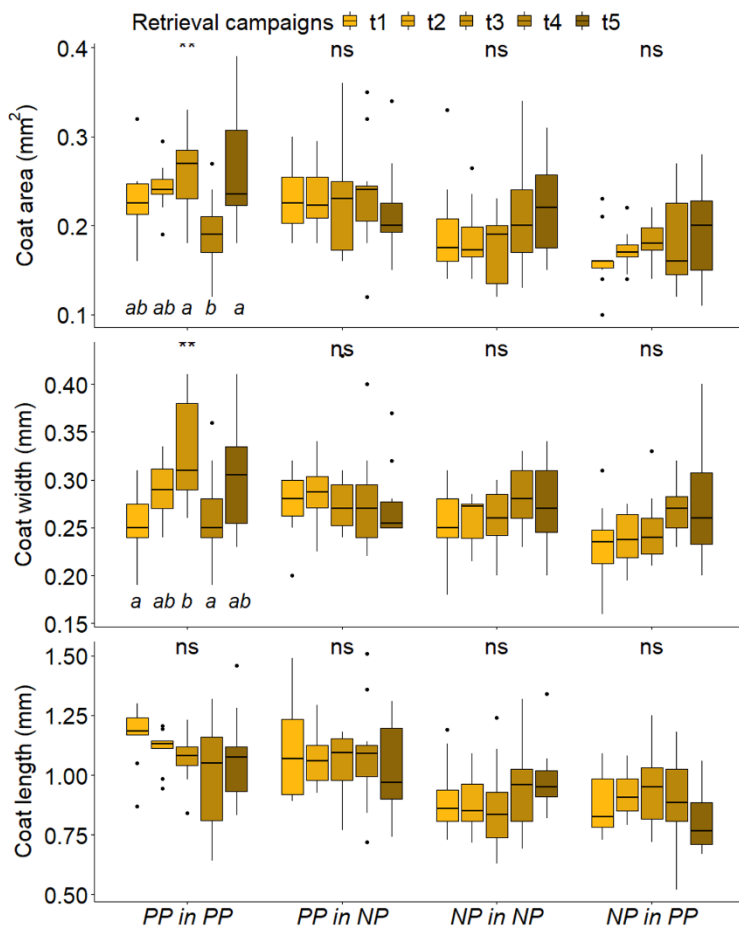

**Figure S2.** Analysis of variance results on morphometric parameters measured in the different retrieval campaigns and in the different sowing treatments.

Morphometric parameters are reported on the y axis, sowing treatments are reported on the x axis (PP in PP indicates metallicolous seeds sowed in the tailing dump; PP in NP indicates metallicolous seeds sowed in the control site; NP in NP indicates control seeds sowed in the control site; NP in PP indicates control seeds sowed in the tailing dump). Retrieval campaigns from t1 to t5 are indicated by different colours. ANOVA or Kruskal-Wallis test results are reported above each series of boxplots as follow: ns=non-significant; \* p < 0.05; \*\* p < 0.01; \*\*\* p < 0.001. Post-hoc results are reported by compact letter display under each boxplot. Level alpha at 0.05. Each boxplot reports 50% of the measured values (inside the box), comprised between the first quartile value (lower side of the box) and the third quartile value (upper side of the box), the median is indicated by the black line inside the box, while whiskers join the first and third quartiles with lower and higher measured value respectively (if present, outliers are reported as black dots).

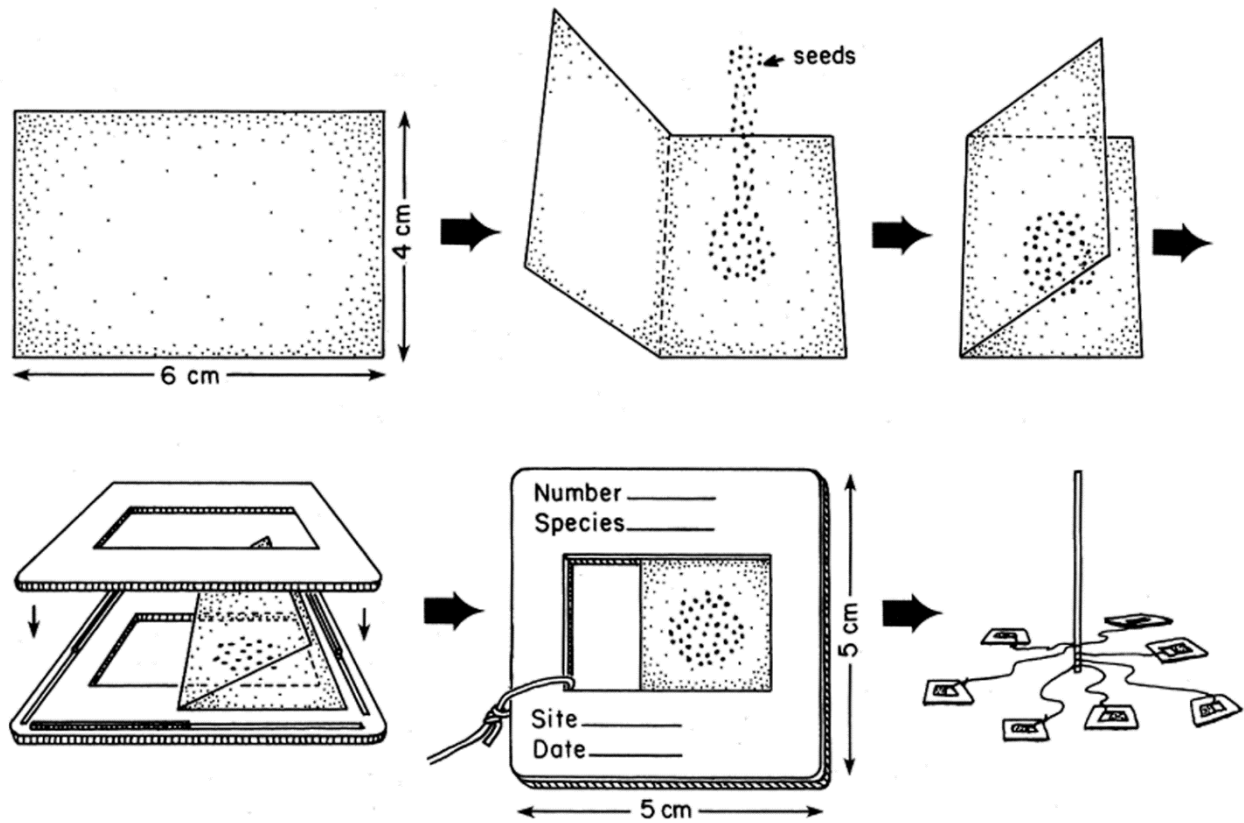

**Figure S3.** Packet building.

Packets used in the present study were built as reported in Rasmussen and Whigham (1993) (reported in the manuscript as [16]) with minor modifications.

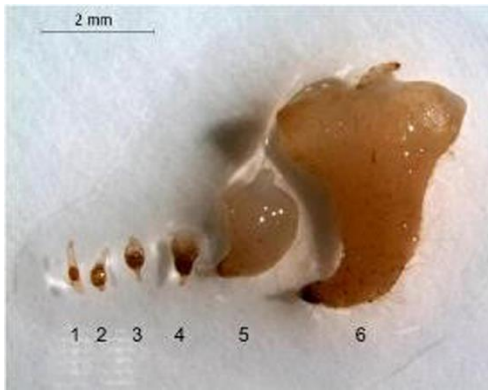

**Figure S4.** Developmental stages of *Epipactis helleborine* seedlings.

*Epipactis helleborine* is a closely related species of *Epipactis tremolsii*. In Těšitelová et al. (2012) (reported in the manuscript as [32]) are reported the initial developmental stages of the species from unmodified seed to branched seedling. “Stage 1: ungerminated seed; stage 2: swollen, non-mycorrhizal seedling; stage 3: small, oval-shaped mycorrhizal seedling; stage 4: pear-shaped seedling longer than 0.5 mm, a protocorm; stage 5: seedling with leaf primordium longer than 1 mm; and stage 6: branched seedling”.

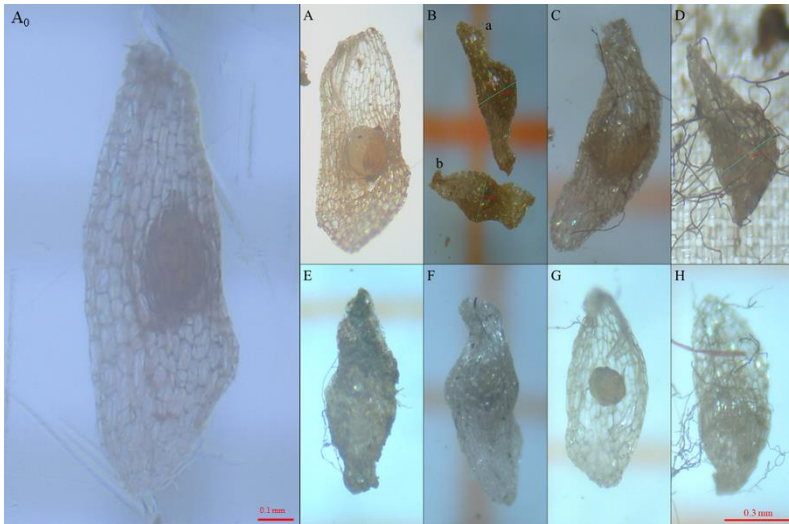

**Figure S5.** Comparison between unmodified seed and developing seeds.

In panel A0 an unmodified seed to be compared with some of the developing seeds observed during the experiment. A, B (a, b), C and D were collected on the third retrieval campaign while E, F, G and H were collected on the fourth. To notice the sensible increase in the embryo width in the passage from S1 to S2 developmental stage.
